# Supplementary material for: Accounting for Experimental Noise Reveals That mRNA Levels, Amplified by Post-Transcriptional Processes, Largely Determine Steady-State Protein Levels in Yeast
Source: PubMed Central journal article supplement (PMC4423881; doi:10.1371/journal.pgen.1005206), 2015-05-07

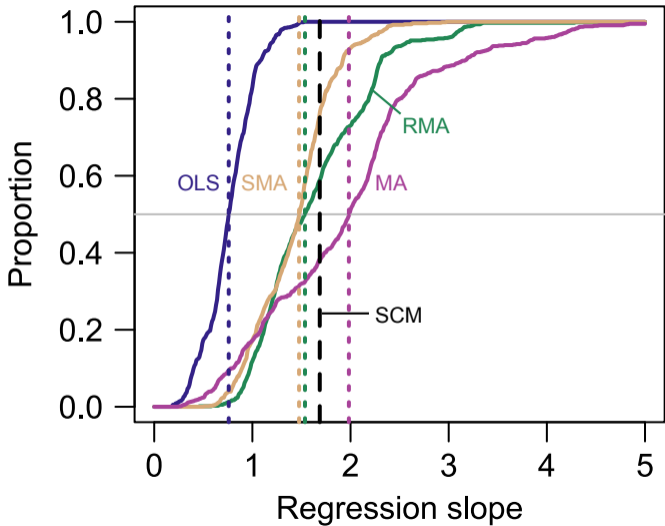

Supplement: pgen.1005206.s002.pdf [file pgen.1005206.s002.pdf]
