# Supplementary material for: Accounting for Experimental Noise Reveals That mRNA Levels, Amplified by Post-Transcriptional Processes, Largely Determine Steady-State Protein Levels in Yeast
Source: PLOS journal article supplement (doi:10.1371/journal.pgen.1005206), 2015-05-07

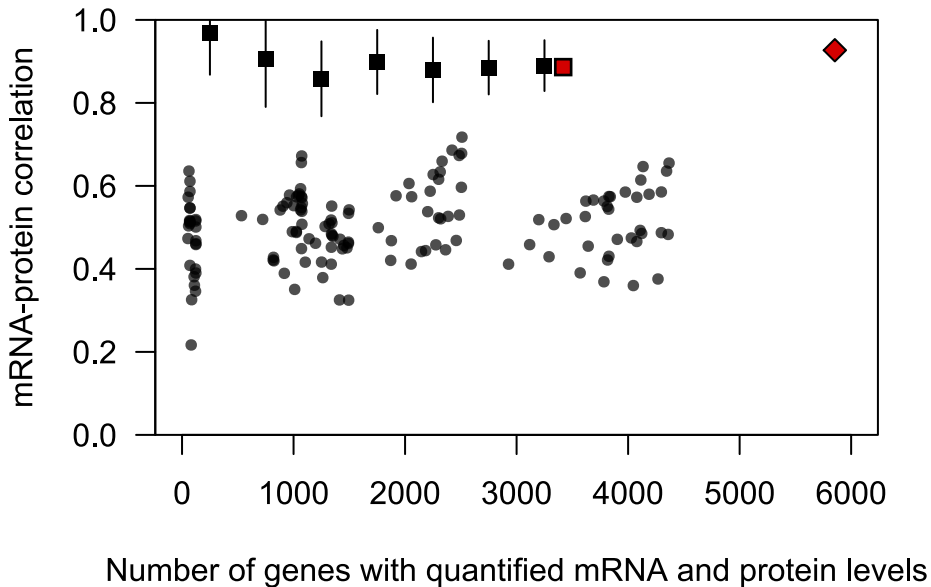

Supplement: S1 (10.1371/journal.pgen.1005206.s001) [file journal.pgen.1005206.s001.pdf › journal.pgen.1005206.s001.pdf]
